# Supplementary material for: Analysis of PM2.5 Variations Based on Observed, Satellite-Derived, and Population-Weighted Concentrations
Source: MDPI journal article supplement (doi:10.3390/rs14143381), 2022-07-14
Supplement: s1 [file s1]

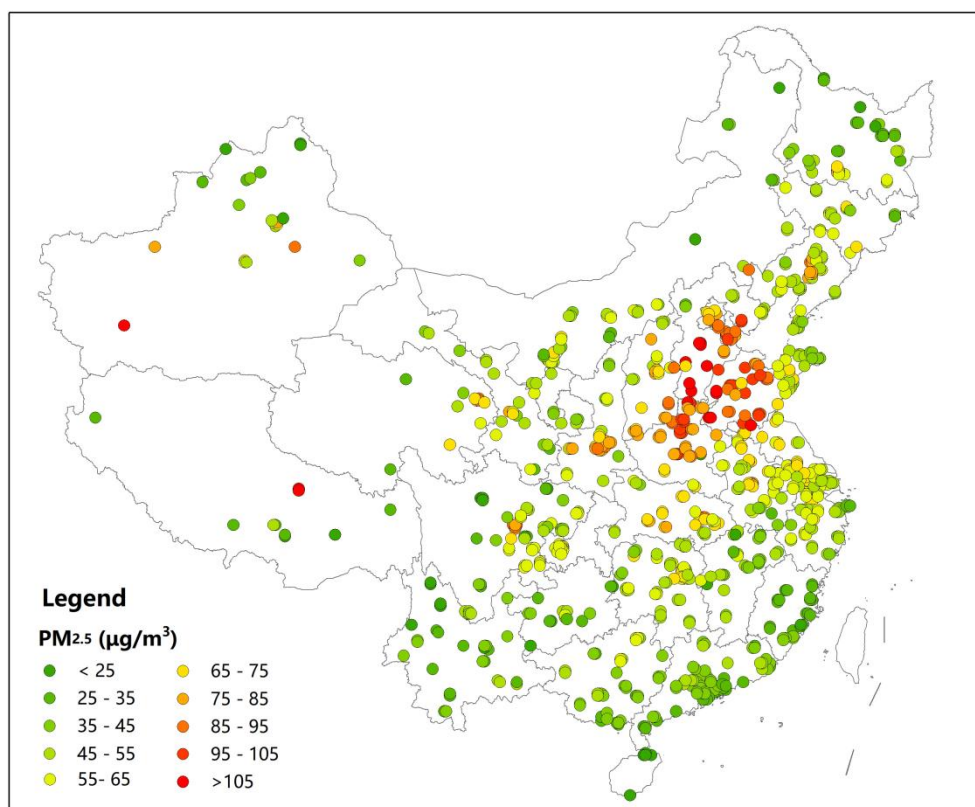

**Figure S1.** Map of average PM<sub>2.5</sub> observations for air quality monitoring stations during the study period.

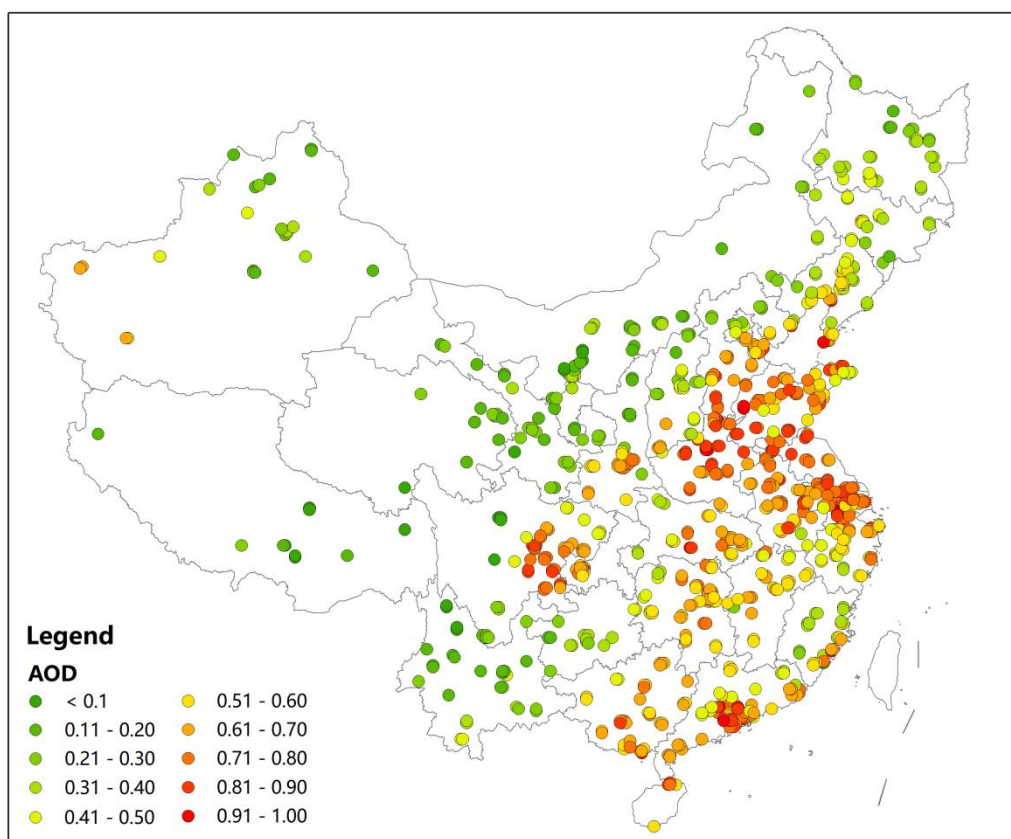

**Figure S2.** Map of average AOD for air quality monitoring stations during the study period.

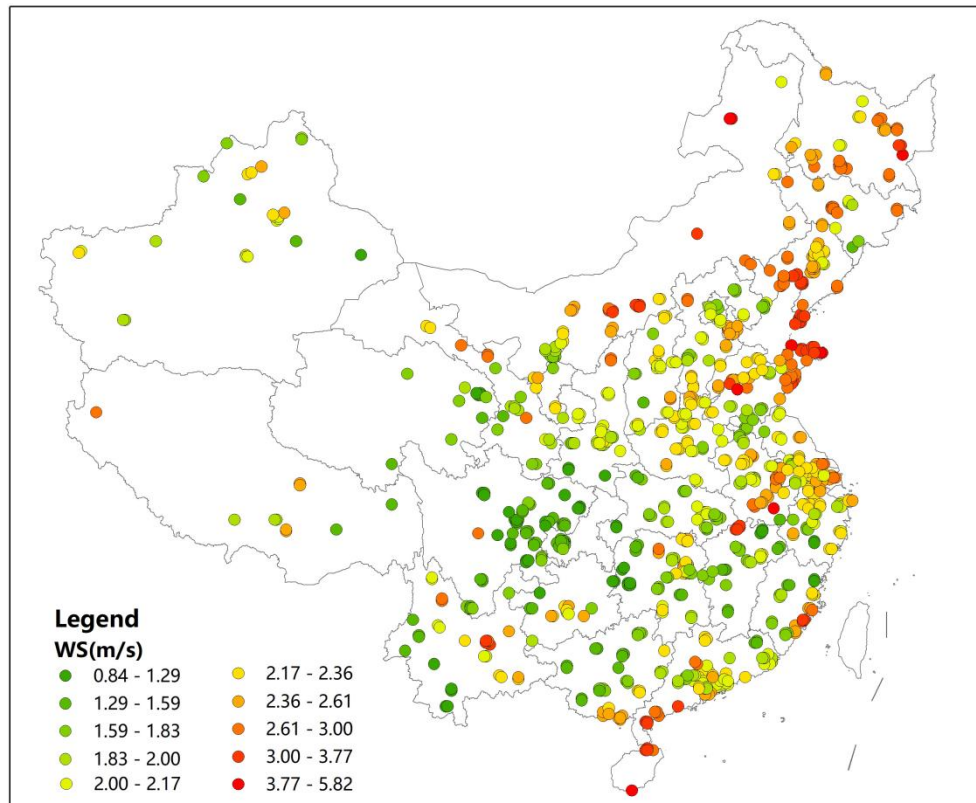

**Figure S3.** Map of average wind speed for air quality monitoring stations during the study period.

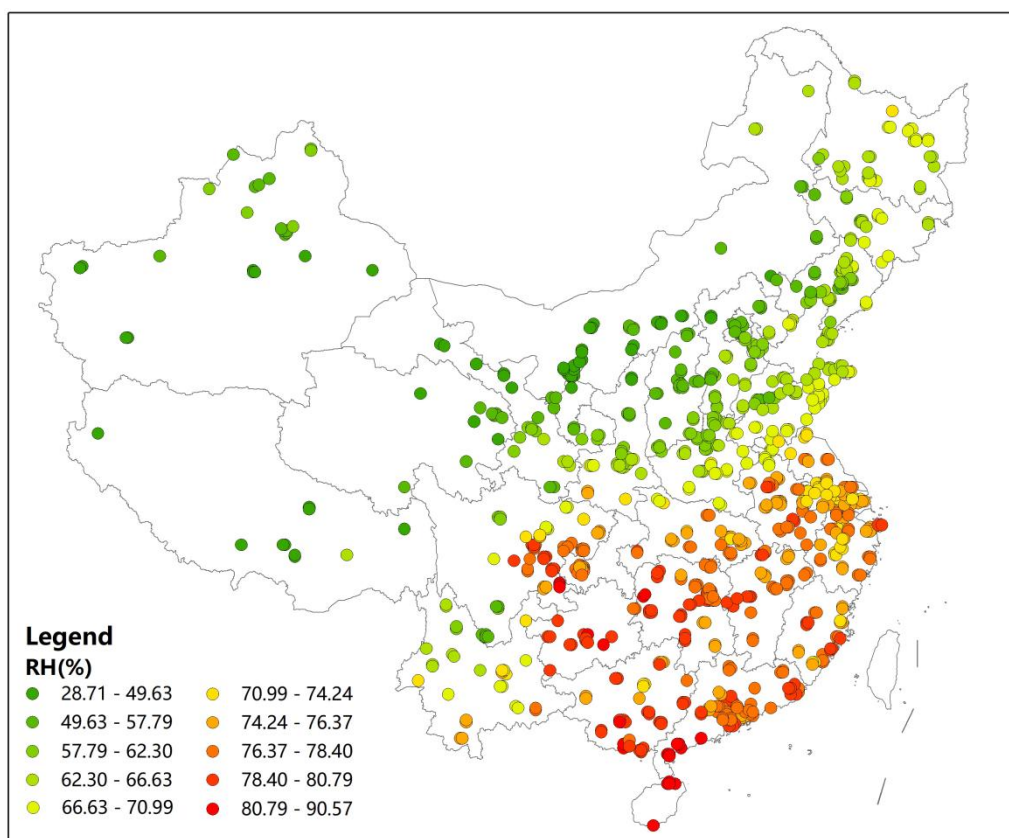

**Figure S4.** Map of average relative humidity for air quality monitoring stations during the study period.

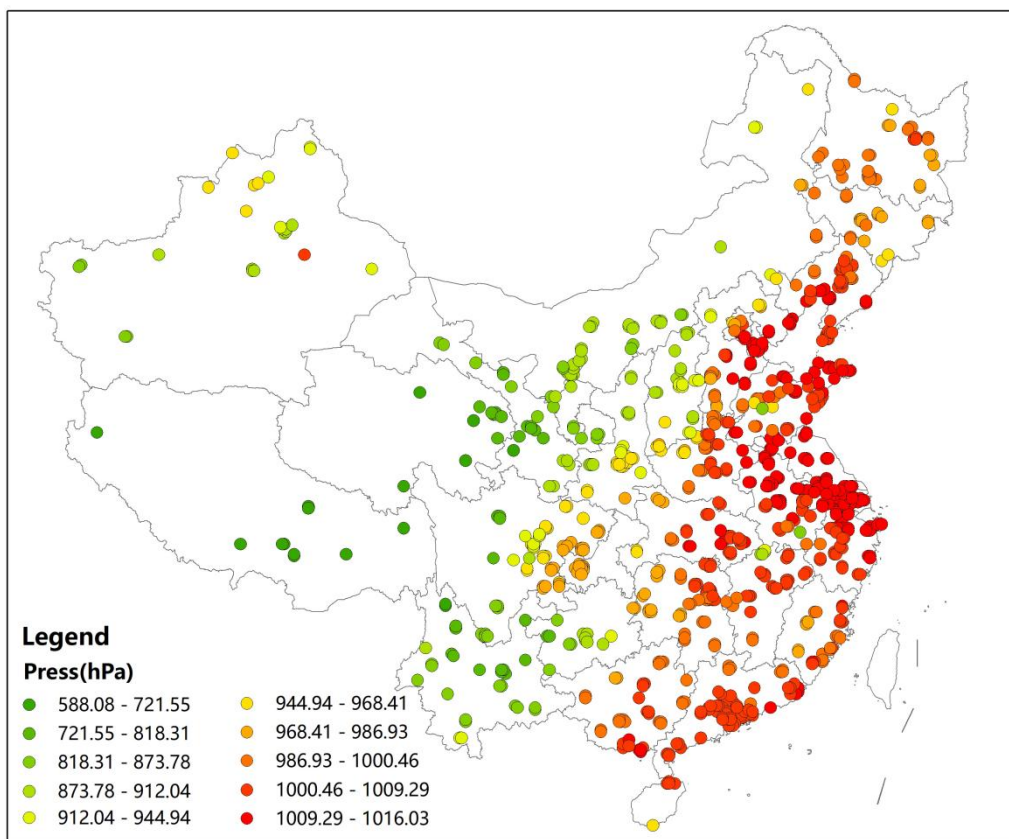

**Figure S5.** Map of average press for air quality monitoring stations during the study period.

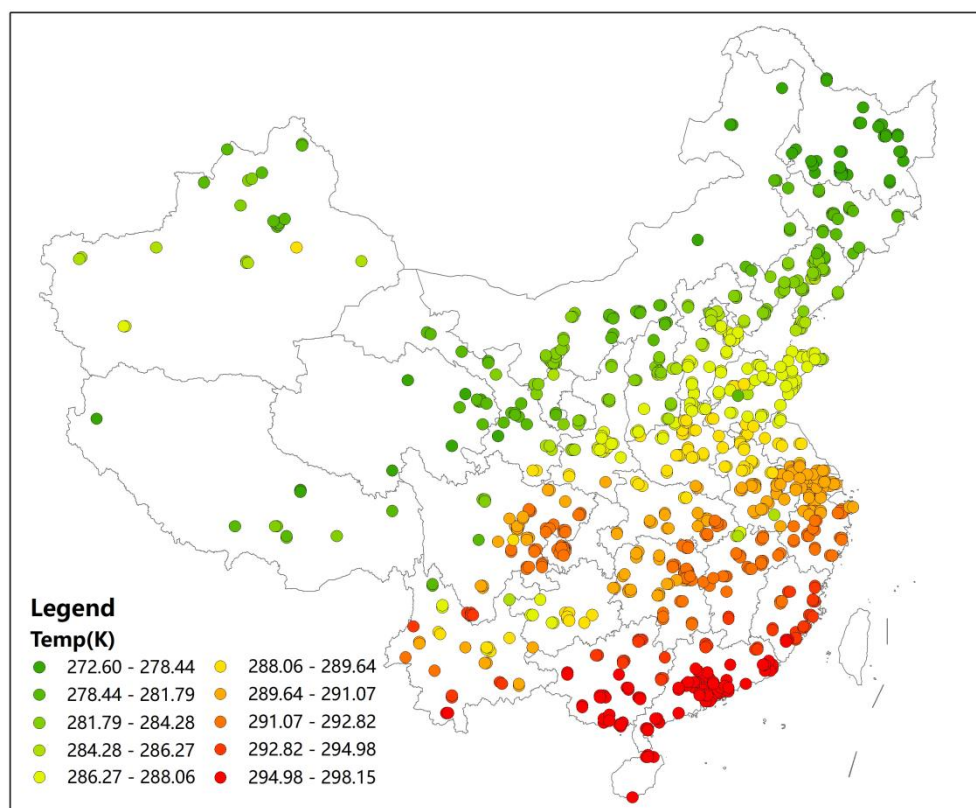

**Figure S6.** Map of average temperature for air quality monitoring stations during the study period.



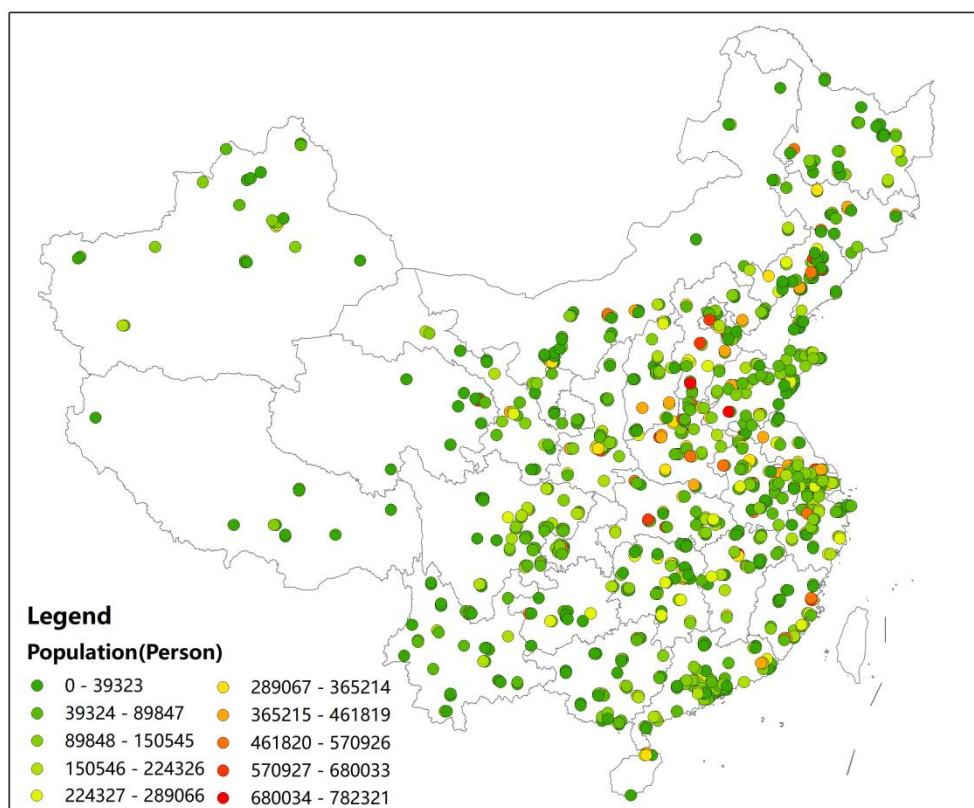

**Figure S7.** Map of population for air quality monitoring stations during the study period.

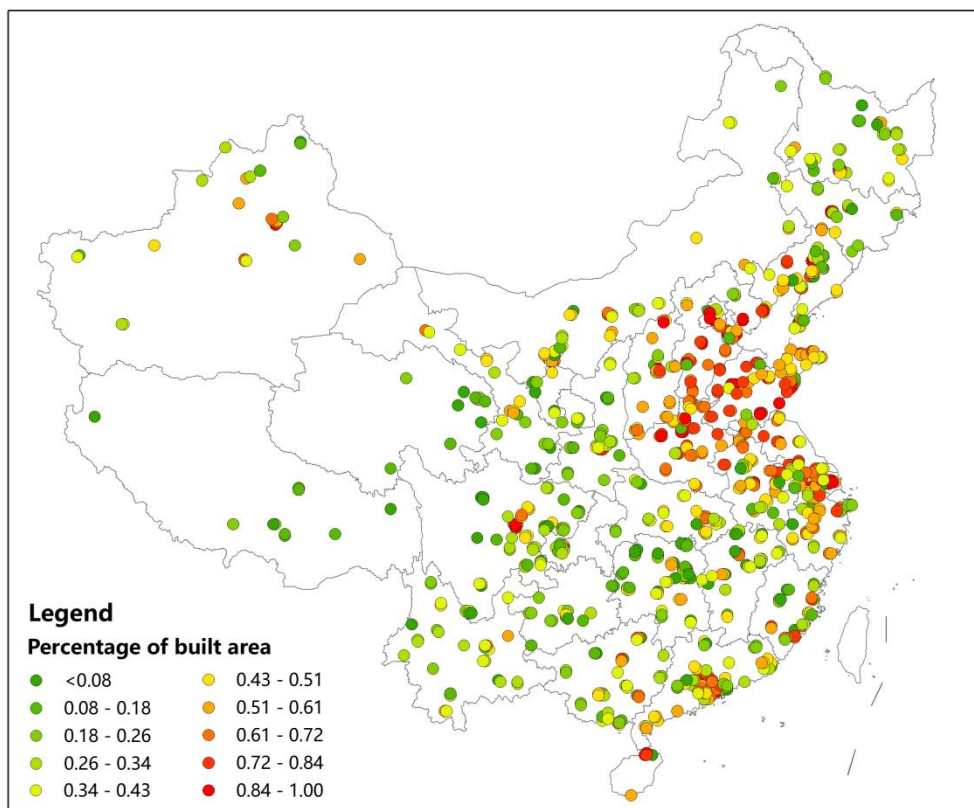

**Figure S8.** Map of percentage of built area for air quality monitoring stations during the study period.

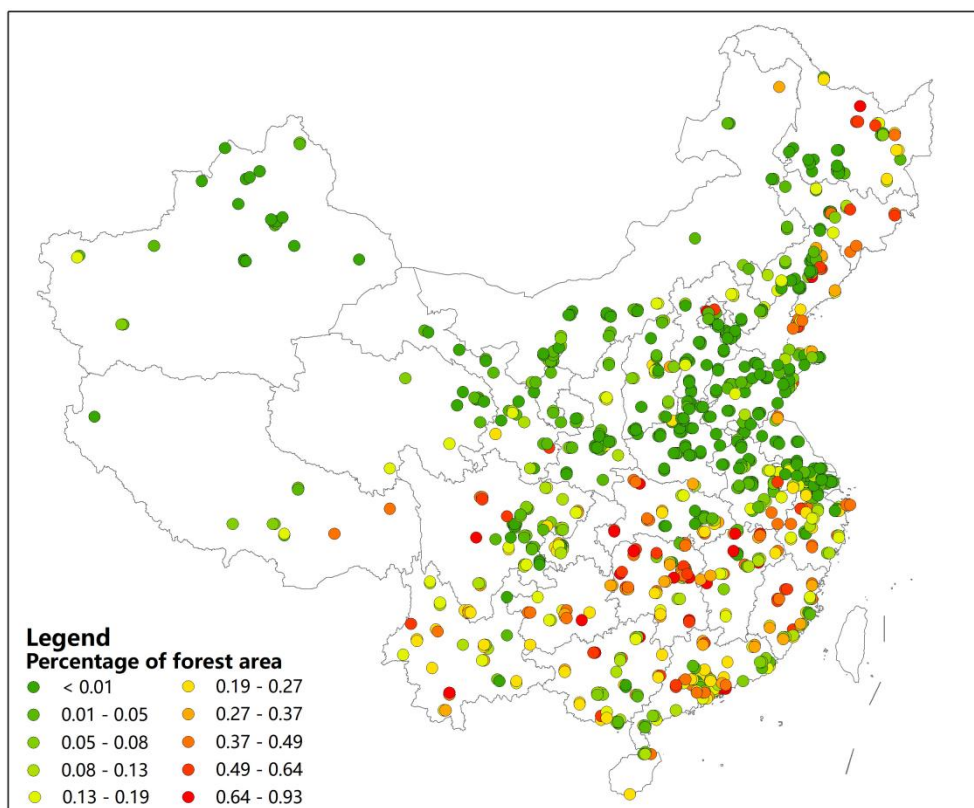

**Figure S9.** Map of percentage of forest area for air quality monitoring stations during the study period.

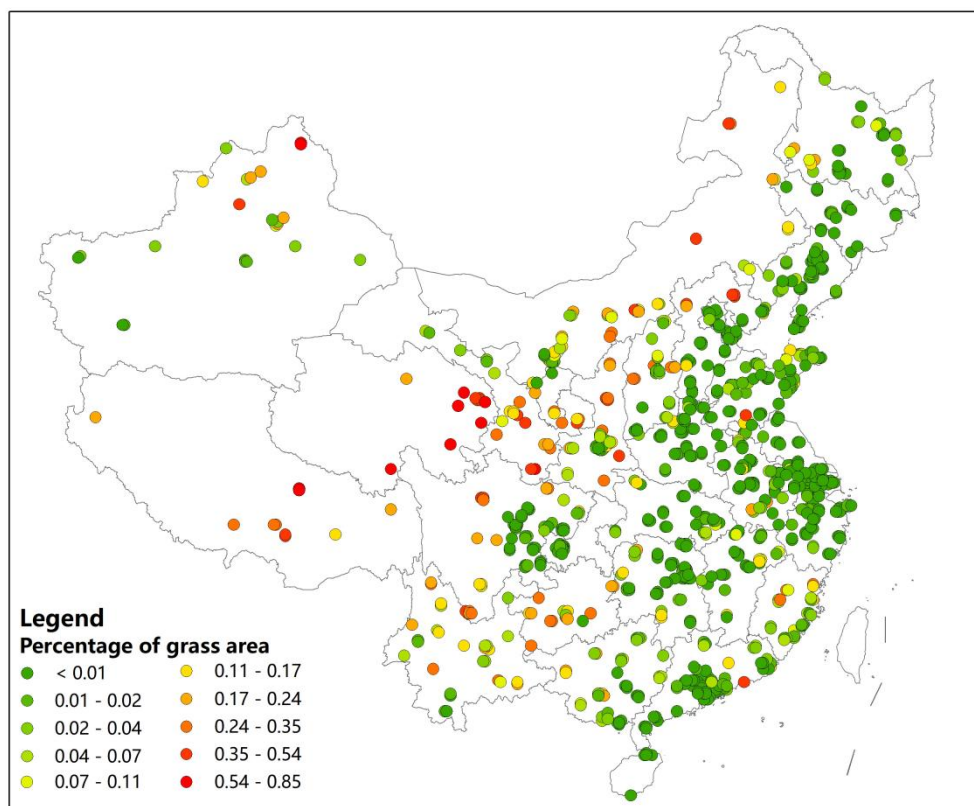

**Figure S10.** Map of percentage of grass area for air quality monitoring stations during the study period.

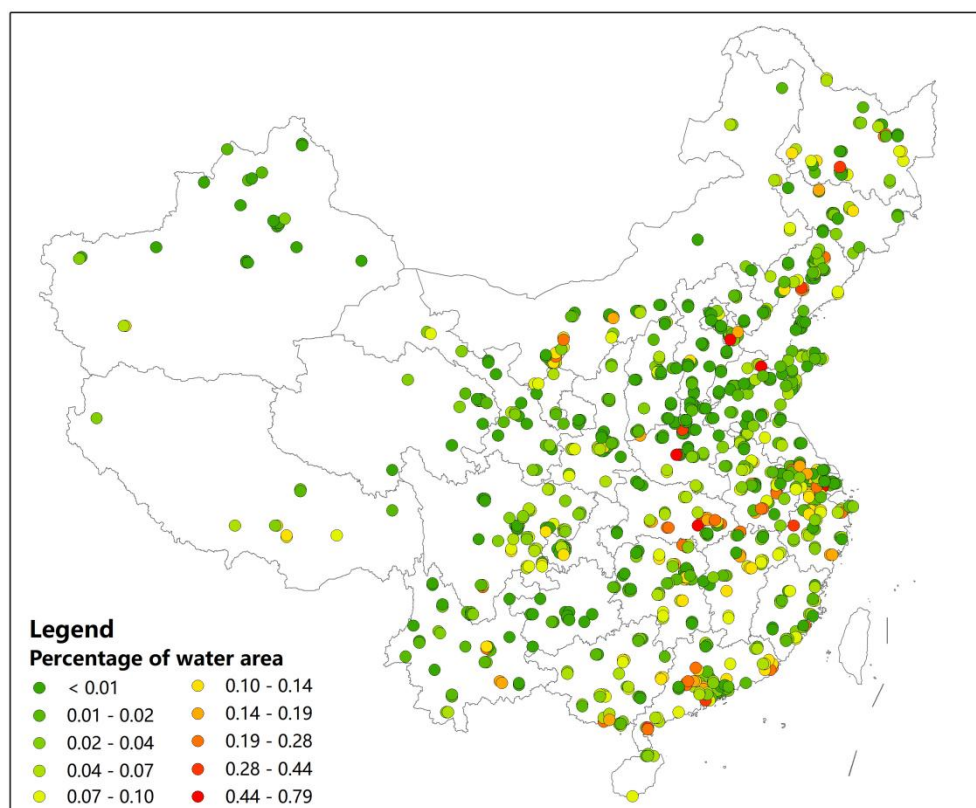

**Figure S11.** Map of percentage of water area for air quality monitoring stations during the study period.

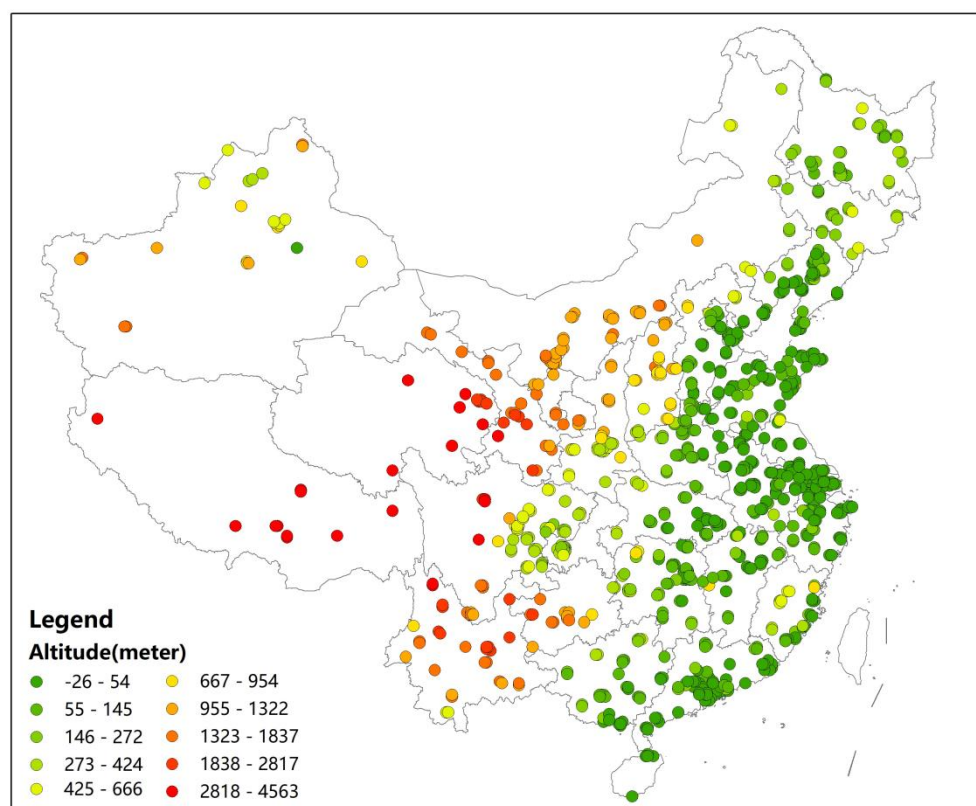

**Figure S12.** Map of altitude for air quality monitoring stations during the study period.

**Table S1.** Statistic of standard error of TSAM with different variable combination()

| Explanatory Variables                          | Min  | Q1   | Mean | Q3   | Max  |
|------------------------------------------------|------|------|------|------|------|
| AOD; WS; ForestPerc; WaterPerc                 | 0.02 | 7.84 | 7.86 | 8.20 | 8.29 |
| AOD; WS; WaterPerc                             | 0.08 | 8.01 | 8.02 | 8.30 | 8.37 |
| AOD; WS; Pop; WaterPerc                        | 0.15 | 8.04 | 8.03 | 8.35 | 8.44 |
| AOD; WS; Pop; ForestPerc                       | 0.02 | 8.01 | 8.04 | 8.36 | 8.45 |
| AOD; WS; ForestPerc                            | 0.02 | 8.05 | 8.09 | 8.37 | 8.44 |
| AOD; WS; RoadLen; WaterPerc                    | 0.24 | 8.13 | 8.12 | 8.42 | 8.51 |
| AOD; WS; Pop; RoadLen                          | 0.28 | 8.22 | 8.23 | 8.52 | 8.61 |
| AOD; WS; Pop                                   | 0.17 | 8.25 | 8.24 | 8.51 | 8.59 |
| AOD; WS; Pop; RoadLen; WaterPerc               | 0.50 | 8.25 | 8.25 | 8.57 | 8.65 |
| AOD; WS                                        | 0.11 | 8.24 | 8.27 | 8.48 | 8.53 |
| AOD; WS; WaterPerc; BuildPerc                  | 0.20 | 8.28 | 8.28 | 8.54 | 8.64 |
| AOD; WS; RoadLen                               | 0.23 | 8.31 | 8.33 | 8.57 | 8.64 |
| AOD; WS; BuildPerc                             | 0.10 | 8.33 | 8.37 | 8.61 | 8.69 |
| AOD; WS; ForestPerc; WaterPerc; BuildPerc      | 0.21 | 8.41 | 8.41 | 8.68 | 8.78 |
| AOD; WS; ForestPerc; GrassPerc; WaterPerc      | 0.44 | 8.46 | 8.44 | 8.72 | 8.78 |
| AOD; WS; GrassPerc; WaterPerc                  | 0.49 | 8.49 | 8.46 | 8.73 | 8.79 |
| AOD                                            | 0.23 | 8.47 | 8.48 | 8.62 | 8.66 |
| AOD; WS; Pop; ForestPerc; GrassPerc; WaterPerc | 0.38 | 8.53 | 8.50 | 8.78 | 8.85 |
| AOD; WS; Pop; WaterPerc; BuildPerc             | 0.55 | 8.52 | 8.50 | 8.76 | 8.85 |
| AOD; WS; GrassPerc                             | 0.32 | 8.53 | 8.51 | 8.75 | 8.80 |
| AOD; WS; Pop; ForestPerc; BuildPerc            | 0.18 | 8.55 | 8.56 | 8.82 | 8.92 |
| AOD; WS; Pop; GrassPerc; WaterPerc             | 0.82 | 8.61 | 8.58 | 8.85 | 8.92 |
| AOD; WS; ForestPerc; GrassPerc                 | 0.43 | 8.59 | 8.58 | 8.83 | 8.88 |
| AOD; WS; Pop; ForestPerc; GrassPerc            | 0.35 | 8.61 | 8.59 | 8.85 | 8.91 |

| Explanatory Variables                                     | Min  | Q1   | Mean | Q3   | Max  |
|-----------------------------------------------------------|------|------|------|------|------|
| AOD; WS; Prec                                             | 0.00 | 8.62 | 8.59 | 8.82 | 8.86 |
| AOD; WS; RoadLen; ForestPerc; WaterPerc                   | 0.14 | 8.60 | 8.59 | 8.86 | 8.92 |
| AOD; WS; ForestPerc; BuildPerc                            | 0.17 | 8.58 | 8.60 | 8.84 | 8.92 |
| AOD; WS; Pop; RoadLen; GrassPerc; WaterPerc               | 1.15 | 8.65 | 8.60 | 8.89 | 8.95 |
| AOD; WS; RoadLen; GrassPerc; WaterPerc                    | 0.91 | 8.64 | 8.61 | 8.88 | 8.94 |
| AOD; WS; Pop; RoadLen; ForestPerc; WaterPerc              | 0.21 | 8.65 | 8.63 | 8.91 | 8.98 |
| AOD; Prec                                                 | 0.00 | 8.68 | 8.64 | 8.82 | 8.85 |
| AOD; WS; RoadLen; GrassPerc                               | 0.78 | 8.71 | 8.69 | 8.93 | 8.99 |
| AOD; WS; ForestPerc; GrassPerc; WaterPerc; BuildPerc      | 0.57 | 8.73 | 8.70 | 8.96 | 9.04 |
| AOD; WS; Pop; RoadLen; GrassPerc                          | 1.24 | 8.75 | 8.72 | 8.97 | 9.03 |
| AOD; WS; Pop; RoadLen; ForestPerc                         | 0.21 | 8.75 | 8.75 | 8.99 | 9.06 |
| AOD; WS; Pop; RoadLen; ForestPerc; GrassPerc; WaterPerc   | 0.29 | 8.80 | 8.76 | 9.02 | 9.09 |
| AOD; WS; ForestPerc; GrassPerc; BuildPerc                 | 0.54 | 8.79 | 8.77 | 9.01 | 9.07 |
| AOD; WS; Pop; ForestPerc; GrassPerc; WaterPerc; BuildPerc | 0.54 | 8.80 | 8.77 | 9.03 | 9.11 |
| AOD; WS; GrassPerc; WaterPerc; BuildPerc                  | 1.01 | 8.80 | 8.78 | 9.01 | 9.08 |
| AOD; WS; RoadLen; ForestPerc; GrassPerc; WaterPerc        | 0.23 | 8.82 | 8.80 | 9.05 | 9.11 |
| AOD; WS; Pop; RoadLen; ForestPerc; GrassPerc              | 0.32 | 8.84 | 8.81 | 9.05 | 9.11 |
| AOD; WS; Pop; GrassPerc; WaterPerc; BuildPerc             | 1.30 | 8.85 | 8.82 | 9.06 | 9.14 |
| AOD; WS; Pop; ForestPerc; GrassPerc; BuildPerc            | 0.56 | 8.85 | 8.83 | 9.06 | 9.14 |
| AOD; WS; RoadLen; ForestPerc; GrassPerc                   | 0.26 | 8.88 | 8.86 | 9.09 | 9.14 |
| AOD; WS; Pop; GrassPerc; BuildPerc                        | 1.25 | 8.92 | 8.89 | 9.12 | 9.18 |
| AOD; WS; Pop; RoadLen; WaterPerc; BuildPerc               | 1.55 | 8.95 | 8.92 | 9.15 | 9.23 |
| AOD; RH                                                   | 2.63 | 8.99 | 8.98 | 9.11 | 9.15 |
| AOD; RH; Prec                                             | 0.02 | 9.04 | 8.98 | 9.16 | 9.19 |
| AOD; WS; RoadLen; WaterPerc; BuildPerc                    | 1.36 | 9.02 | 9.00 | 9.21 | 9.28 |



| Explanatory Variables                                              | Min  | Q1   | Mean | Q3    | Max   |
|--------------------------------------------------------------------|------|------|------|-------|-------|
| AOD; WS; Pop; RoadLen; BuildPerc                                   | 1.50 | 9.06 | 9.04 | 9.24  | 9.31  |
| AOD; WS; RoadLen; GrassPerc; WaterPerc; BuildPerc                  | 1.97 | 9.07 | 9.04 | 9.25  | 9.32  |
| AOD; WS; Pop; RoadLen; GrassPerc; WaterPerc; BuildPerc             | 2.42 | 9.10 | 9.06 | 9.28  | 9.34  |
| AOD; WS; RoadLen; BuildPerc                                        | 1.16 | 9.09 | 9.08 | 9.27  | 9.33  |
| AOD; WS; RoadLen; ForestPerc; WaterPerc; BuildPerc                 | 0.51 | 9.10 | 9.08 | 9.29  | 9.35  |
| AOD; WS; Pop; RoadLen; GrassPerc; BuildPerc                        | 2.29 | 9.12 | 9.09 | 9.29  | 9.35  |
| AOD; WS; RoadLen; GrassPerc; BuildPerc                             | 1.95 | 9.13 | 9.09 | 9.29  | 9.35  |
| AOD; WS; Pop; RoadLen; ForestPerc; BuildPerc                       | 0.58 | 9.12 | 9.10 | 9.29  | 9.36  |
| AOD; WS; Pop; RoadLen; ForestPerc; WaterPerc; BuildPerc            | 0.71 | 9.15 | 9.12 | 9.32  | 9.38  |
| AOD; WS; RoadLen; ForestPerc; BuildPerc                            | 0.50 | 9.19 | 9.17 | 9.35  | 9.41  |
| AOD; WS; RH                                                        | 1.97 | 9.30 | 9.28 | 9.41  | 9.44  |
| AOD; WS; RoadLen; ForestPerc; GrassPerc; WaterPerc; BuildPerc      | 1.01 | 9.35 | 9.34 | 9.51  | 9.57  |
| AOD; WS; RoadLen; ForestPerc; GrassPerc; BuildPerc                 | 0.94 | 9.37 | 9.35 | 9.51  | 9.56  |
| AOD; WS; Pop; RoadLen; ForestPerc; GrassPerc; WaterPerc; BuildPerc | 2.11 | 9.38 | 9.36 | 9.53  | 9.59  |
| AOD; WS; Pop; RoadLen; ForestPerc; GrassPerc; BuildPerc            | 2.07 | 9.39 | 9.38 | 9.53  | 9.59  |
| AOD; WS; RH; Prec                                                  | 0.12 | 9.98 | 9.92 | 10.03 | 10.06 |

Min: minimum value; Q1: lower quartile; Mean: average; Q3: upper quartile; Max: maximum.

WS: wind speed; RH: relative humidity; Prec: precipitation;

BuildPerc: percentage of built area; ForestPerc: percentage of forest area; WaterPerc: percentage of water area;

GrassPerc: percentage of grass area; RoadLen: the total length of road; Pop: population in the grid.
